# Supplementary material for: Comparison of Growth and Chemical Profile of Diatom Skeletonema grevillei in Bioreactor and Incubation-Shaking Cabinet in Two Growth Phases
Source: MDPI journal article supplement (doi:10.3390/md20110697), 2022-11-07
Supplement: s1 [file s1]

**Table S1.** List of identified compounds from *Skeletonema grevillei* extracts by GC-MS in incubation-shaking cabinet after 192 hours.

| No. | Retention time | Retention index | Identified compound               | MS <i>m/z</i> (relative intensity)                                                      | Similarity (%) | Molar weight | Area   | Proportion (%) |
|-----|----------------|-----------------|-----------------------------------|-----------------------------------------------------------------------------------------|----------------|--------------|--------|----------------|
| 1   | 4.844          | 1335            | Nonanoic acid, TMS derivative     | 216(15), 215(96), 145(15), 132(31), 131(21), 129(25), 117(84), 75(93), 73(100), 55(15)  | 95             | 230          | 565805 | 0,10           |
| 2   | 6.993          | 1444            | Decanoic acid, TMS derivative     | 229(83), 145(14), 132(39), 131(22), 128(33), 117(90), 75(83), 73(100), 55(14), 41(17)   | 94             | 244          | 164887 | 0,03           |
| 3   | 8.317          | 1507            | Hexanedioic acid, 2TMS derivative | 275(824), 172(21), 159(31), 146(36), 141(24), 117(29), 110(51), 74(67), 73(100), 54(29) | 78             | 290          | 66251  | 0,01           |
| 4   | 11.442         | 1650            | Dodecanoic acid, TMS derivative   | 257(92), 145(17), 132(55), 131(21), 129(40), 117(99), 74(82), 73(100), 55(19), 43(24)   | 93             | 272          | 201701 | 0,04           |
| 5   | 12.318         | 1691            | Tetradecanenitrile                | 110(89), 97(100), 96(80), 83(57), 82(57), 70(49), 57(74), 55(51), 43(78), 41(72)        | 93             | 209          | 87904  | 0,02           |
| 6   | 13.587         | 1751            | Tridecanoic acid, TMS derivative  | 272(23), 271(99), 145(21), 132(39), 129(31), 117(100), 75(60), 73(75), 54(19), 43(24)   | 88             | 286          | 186829 | 0,03           |
| 7   | 13.683         | 1758            | Tetradecanamide                   | 206(10), 75(16), 73(23), 72(38), 59(100), 57(10), 55(14), 44(16), 43(23), 41(19)        | 83             | 227          | 111560 | 0,02           |
| 8   | 14.347         | 1787            | Loliolide, TMS                    | 268(18), 253(35), 211(40), 178(54), 135(19), 133(19), 75(100), 73(61), 44(16), 43(34)   | 86             | 268          | 44086  | 0,01           |

|           |        |      |                                       |                                                                                              |    |     |         |      |
|-----------|--------|------|---------------------------------------|----------------------------------------------------------------------------------------------|----|-----|---------|------|
| <b>9</b>  | 14.722 | 1805 | Azelaic acid, 2TMS<br>derivative      | 317(34), 201(25), 148(24), 147(26),<br>131(46), 129(23), 116(23), 74(73),<br>73(100), 55(32) | 88 | 332 | 305017  | 0,05 |
| <b>10</b> | 15.649 | 1852 | Myristic acid, TMS<br>derivative      | 286(17), 285(84), 145(24), 132(51),<br>129(40), 117(100), 75(68), 73(92),<br>55(20), 43(21)  | 95 | 300 | 9067143 | 1,59 |
| <b>11</b> | 16.178 | 1877 | Palmitoleonitrile                     | 136(61), 122(85), 83(32), 70(35),<br>69(72), 56(37), 55(100), 54(28),<br>43(39), 41(79)      | 94 | 235 | 429668  | 0,08 |
| <b>12</b> | 16.595 | 1898 | Heptadecanenitrile                    | 124(55), 110(83), 97(100), 96(77),<br>82(46), 70(49), 57(95), 55(61), 43(99),<br>41(83),     | 96 | 251 | 1106265 | 0,19 |
| <b>13</b> | 17.616 | 1951 | Pentadecanoic acid, TMS<br>derivative | 300(20), 299(84), 145(29), 132(50),<br>129(38), 117(100), 74(61), 73(86),<br>55(18), 43(24)  | 93 | 314 | 599302  | 0,10 |
| <b>14</b> | 17.953 | 1968 | Tetradecanamide                       | 128(6), 86(6), 72(39), 60(7), 59(100),<br>57(6), 55(9), 44(9), 43(17), 41(13)                | 96 | 227 | 3666421 | 0,64 |
| <b>15</b> | 18.149 | 1978 | (Z)-9-Octadecenitrile                 | 136(70), 122(65), 97(37), 83(38),<br>80(38), 69(80), 56(43), 55(100),<br>43(45), 41(83)      | 94 | 263 | 133518  | 0,02 |
| <b>16</b> | 19.097 | 2031 | Palmitelaidic acid, TMS               | 311(75), 145(31), 129(61), 116(93),<br>96(27), 74(88), 73(100), 69(23),<br>55(49), 41(30)    | 88 | 326 | 9338939 | 1,63 |
| <b>17</b> | 19.505 | 2052 | Palmitic Acid, TMS<br>derivative      | 314(17), 313(69), 145(26), 132(51),<br>129(35), 117(100), 74(58), 73(81),<br>55(19), 43(23)  | 96 | 328 | 9455560 | 1,65 |
| <b>18</b> | 19.937 | 2076 | 9-Octadecynenitrile                   | 96(35), 95(56), 82(47), 81(90), 79(33),<br>68(43), 67(100), 55(62), 54(41), 41(60)           | 89 | 261 | 2434268 | 0,43 |

|    |        |      |                                             |                                                                                             |    |     |           |       |
|----|--------|------|---------------------------------------------|---------------------------------------------------------------------------------------------|----|-----|-----------|-------|
| 19 | 20.072 | 2082 | (Z)-9-Octadecenitrile                       | 136(69), 122(85), 97(42), 83(52),<br>70(40), 69(74), 56(41), 55(100),<br>43(49), 41(82)     | 97 | 263 | 34869389  | 6,10  |
| 20 | 21.311 | 2151 | Heptadecanoic acid,<br>trimethylsilyl ester | 328(20), 327(78), 145(29), 132(57),<br>128(40), 117(100), 75(63), 73(94),<br>43(28), 41(16) | 91 | 342 | 235014    | 0,04  |
| 21 | 21.432 | 2158 | Palmitoleamide                              | 126(14), 98(11), 72(69), 69(17),<br>60(10), 59(100), 55(31), 44(15),<br>43(21), 41(27)      | 97 | 253 | 5559867   | 0,97  |
| 22 | 21.814 | 2178 | Hexadecanamide                              | 128(7), 86(6), 72(43), 60(8), 59(100),<br>57(8), 55(10), 44(8), 43(19), 41(12)              | 98 | 255 | 11036086  | 1,93  |
| 23 | 21.908 | 2184 | Phytol, TMS derivative                      | 144(14), 143(100), 123(15), 81(9),<br>74(19), 73(24), 59(7), 57(7), 55(7),<br>43(11)        | 93 | 368 | 1129242   | 0,20  |
| 24 | 23.042 | 2251 | Stearic acid, TMS derivative                | 341(22), 145(23), 132(53), 129(36),<br>117(100), 75(35), 73(62), 55(15),<br>43(17), 41(9)   | 95 | 356 | 4280221   | 0,75  |
| 25 | 25.955 | 2423 | Oleamide, TMS derivative                    | 353(24), 338(56), 144(74), 131(100),<br>128(42), 116(50), 75(61), 73(58),<br>55(22), 41(19) | 84 | 353 | 161851002 | 28,29 |
| 26 | 26.028 | 2431 | Oleamide, TMS derivative                    | 353(20), 338(39), 144(46), 131(100),<br>128(33), 116(43), 75(59), 73(54),<br>55(24), 41(19) | 82 | 353 | 257549477 | 45,02 |
| 27 | 26.303 | 2449 | Octadecanamide, N-TMS<br>derivate           | 341(22), 341(5), 144(13), 132(11),<br>131(100), 128(7), 116(27), 75(21),<br>73(24), 43(10), | 95 | 355 | 7824268   | 1,37  |
| 28 | 28.188 | 2571 | (Z)-13-Docosenamide                         | 126(16), 83(16), 72(78), 69(25),<br>60(15), 59(100), 57(19), 55(47),<br>43(32), 41(32)      | 93 | 337 | 4649338   | 0,81  |

|    |        |      |                                                 |                                                                                        |    |     |          |      |
|----|--------|------|-------------------------------------------------|----------------------------------------------------------------------------------------|----|-----|----------|------|
| 29 | 28.308 | 2578 | 2-Palmitoylglycerol, 2TMS derivative            | 313(27), 217(93), 202(29), 147(48), 129(100), 103(37), 73(71), 57(23), 55(22), 43(29)  | 93 | 474 | 1822253  | 0,32 |
| 30 | 28.787 | 2610 | 1-Monopalmitin, 2TMS derivative                 | 372(29), 371(100), 239(14), 202(12), 147(24), 129(13)73(28), 71(10), 57(16), 43(15)    | 94 | 474 | 2677655  | 0,47 |
| 31 | 31.104 | 2771 | 2-Monostearin, 2TMS derivative                  | 341(23), 218(85), 203(26), 191(22), 147(42), 129(100), 103(38), 73(56), 57(22), 43(26) | 89 | 502 | 7314710  | 1,28 |
| 32 | 31.583 | 2804 | Glycerol monostearate, 2TMS derivative          | 400(24), 399(100), 203(13), 147(20), 129(15), 73(29), 71(10), 57(16), 55(9), 43(15)    | 95 | 502 | 20125448 | 3,52 |
| 33 | 34.199 | 2998 | 2,3-Dihydroxypropyl icosanoate, 2TMS derivative | 429(12), 428(32), 427(100), 203(17), 147(25), 129(20), 73(33), 71(11), 57(20), 43(17)  | 87 | 530 | 239422   | 0,04 |
| 34 | 36.261 | 3162 | Cholesterol, TMS derivative                     | 458(48), 368(81), 353(37), 329(78), 129(100), 121(34), 95(39), 81(32), 75(33), 73(49)  | 96 | 458 | 6916629  | 1,21 |
| 35 | 37.502 | 3260 | 24-Methylene cholesterol                        | 386(47), 129(100), 119(42), 107(33), 95(40), 81(37), 74(36), 73(60), 69(43), 55(41)    |    |     | 6010162  | 1,05 |

---

**Table S2.** List of identified compounds from *Skeletonema grevillei* extracts by GC-MS in incubation-shaking cabinet after 312 hours.

| No. | Retention time (min) | Retention index | Identified compound                    | MS <i>m/z</i> (relative intensity)                                                     | Similarity (%) | Molar weight | Area     | Proportion (%) |
|-----|----------------------|-----------------|----------------------------------------|----------------------------------------------------------------------------------------|----------------|--------------|----------|----------------|
| 1   | 5.667                | 1379            | Decanoic acid, TMS derivative          | 335(8), 244(14), 234(8), 232(21), 189(10), 148(8), 147(48), 74(11), 73(100), 45(8)     | 92             | 244          | 160102   | 0,04           |
| 2   | 7.061                | 1448            | Butanedioic acid, TMS derivate         | 244(12), 232(23), 189(16), 147(64), 133(12), 75(10), 73(100), 55(16), 45(13), 43(10)   | 75             | 350          | 48587    | 0,01           |
| 3   | 11.004               | 1630            | Dodecanoic acid, TMS derivate          | 258(16), 132(43), 131(15), 129(35), 117(100), 74(74), 73(92), 55(19), 43(15), 41(17)   | 95             | 272          | 206258   | 0,05           |
| 4   | 13.336               | 1739            | Tridecanoic acid, TMS derivative       | 271(80), 144(21), 132(38), 129(34), 117(95), 74(76), 73(100), 55(21), 43(21), 41(19)   | 93             | 286          | 591014   | 0,13           |
| 5   | 14.053               | 1773            | Loliolide, TMS                         | 268(18), 252(59), 211(41), 178(56), 162(17), 135(17), 133(22), 74(100), 73(56), 43(41) | 92             | 268          | 996732   | 0,22           |
| 6   | 14.526               | 1796            | Azelaic acid, 2TMS ester               | 317(30), 201(37), 152(23), 148(25), 147(25), 131(48), 116(31), 74(66), 73(100), 55(41) | 80             | 332          | 96955    | 0,02           |
| 7   | 15.258               | 1831            | Myristoleic acid, trimethylsilyl ester | 283(79), 145(24), 131(31), 129(60), 116(78), 96(26), 74(94), 73(100), 55(44), 41(20)   | 86             | 298          | 267138   | 0,06           |
| 8   | 15.512               | 1845            | Myristic acid, TMS derivative          | 285(72), 145(23), 132(44), 129(34), 117(100), 75(64), 73(87), 55(19), 43(20), 41(15)   | 96             | 300          | 23200617 | 5,12           |

|           |        |      |                                             |                                                                                             |    |     |          |      |
|-----------|--------|------|---------------------------------------------|---------------------------------------------------------------------------------------------|----|-----|----------|------|
| <b>9</b>  | 16.468 | 1956 | Hexadecanenitrile                           | 110(66), 97(76), 96(61), 83(46),<br>75(53), 73(99), 57(90), 55(67),<br>43(100), 41(87)      | 82 | 251 | 152460   | 0,03 |
| <b>10</b> | 17.533 | 1947 | Pentadecanoic acid, TMS<br>derivative       | 300(21), 299(81), 145(24), 132(49),<br>129(38), 117(100), 75(56), 73(83),<br>55(17), 43(22) | 94 | 314 | 1051806  | 0,23 |
| <b>11</b> | 17.825 | 1960 | 1-Hexadecanol, TMS<br>derivative            | 300(30), 299(100), 103(11), 97(15),<br>88(6), 83(10), 75(22), 71(6), 57(8),<br>43(8)        | 93 | 314 | 238211   | 0,05 |
| <b>12</b> | 17.868 | 1964 | Tetradecanamide                             | 86(7), 73(7), 72(38), 60(7), 59(100),<br>57(5), 55(9), 44(9), 43(19), 41(13)                | 95 | 227 | 1137392  | 0,25 |
| <b>13</b> | 19.051 | 2026 | Palmitelaidic acid, TMS                     | 486(1), 479(1), 395(1), 320(1), 317(2),<br>307(2), 288(2), 287(17), 233(1),<br>59(100)      | 96 | 326 | 35754904 | 7,89 |
| <b>14</b> | 19.458 | 2049 | Palmitic Acid, TMS<br>derivative            | 313(28), 145(27), 132(55), 129(37),<br>117(100), 74(66), 73(90), 55(24),<br>43(29), 41(18)  | 96 | 328 | 9373599  | 2,07 |
| <b>15</b> | 19.995 | 2078 | (Z)-9-Octadecenitrile                       | 136(63), 122(85), 97(43), 83(50),<br>70(37), 69(69), 56(39), 55(100),<br>43(44), 41(75)     | 97 | 263 | 1670032  | 0,37 |
| <b>16</b> | 21.284 | 2149 | Heptadecanoic acid,<br>trimethylsilyl ester | 327(82), 145(31), 132(53), 129(45),<br>116(100), 74(57), 73(55), 59(43),<br>55(30), 41(26)  | 80 | 342 | 84649    | 0,02 |
| <b>17</b> | 21.390 | 2155 | Palmitoleamide                              | 126(14), 112(11), 72(72), 69(16),<br>60(11), 59(100), 55(34), 44(16),<br>43(22), 41(28)     | 96 | 253 | 1650580  | 0,36 |
| <b>18</b> | 21.492 | 2161 | 1-Octadecanol, TMS<br>derivative            | 328(29), 327(100), 97(9), 75(22),<br>73(13), 72(11), 69(9), 59(18), 55(9),<br>43(12)        | 86 | 342 | 235080   | 0,05 |

|    |        |      |                                       |                                                                                        |    |     |           |       |
|----|--------|------|---------------------------------------|----------------------------------------------------------------------------------------|----|-----|-----------|-------|
| 19 | 21.768 | 2176 | Hexadecanamide                        | 128(7), 86(6), 72(44), 60(9), 59(100), 57(8), 55(11), 44(8), 43(19), 41(13)            | 97 | 255 | 2374640   | 0,52  |
| 20 | 21.882 | 2183 | Phytol, TMS derivative                | 144(12), 143(100), 124(5), 123(14), 81(8), 75(18), 73(24), 57(7), 55(5), 43(8)         | 97 | 368 | 9333113   | 2,06  |
| 21 | 22.420 | 2213 | Linoleic, TMS derivative              | 337(42), 144(37), 131(67), 116(48), 81(38), 74(100), 73(96), 67(45), 55(40), 41(32)    | 88 | 352 | 1084296   | 0,24  |
| 22 | 23.017 | 2250 | Stearic acid, TMS derivative          | 342(17), 341(61), 145(31), 132(53), 129(38), 117(100), 74(39), 73(60), 55(17), 43(20)  | 95 | 356 | 2380761   | 0,53  |
| 23 | 24.950 | 2364 | 9-Octadecenamide                      | 126(16), 112(12), 72(72), 69(16), 60(12), 59(100), 55(33), 44(13), 43(23), 41(26)      | 96 | 281 | 63315094  | 13,97 |
| 24 | 25.210 | 2380 | Eicosapentaenoic Acid, TMS derivative | 119(46), 117(63), 106(42), 105(46), 93(49), 91(75), 79(100), 73(89), 74(75), 67(54)    | 96 | 374 | 17129637  | 3,78  |
| 25 | 25.889 | 2422 | Oleamide, TMS derivative              | 353(22), 338(55), 198(19), 144(65), 131(100), 128(41), 116(49), 74(61), 73(55), 55(22) | 82 | 353 | 161013588 | 35,53 |
| 26 | 26.274 | 2419 | Octadecanamide, N-TMS derivate        | 341(6), 340(21), 144(12), 132(11), 131(100), 128(7), 116(30), 74(23), 73(25), 43(11)   | 95 | 355 | 3410043   | 0,75  |
| 27 | 28.296 | 2577 | 2-Palmitoylglycerol, 2TMS derivative  | 313(28), 218(90), 202(28), 190(22), 147(44), 129(100), 103(41), 73(69), 57(22), 43(26) | 94 | 474 | 8519649   | 1,88  |
| 28 | 28.786 | 2610 | 1-Monopalmitin, 2TMS derivative       | 459(9), 372(30), 371(100), 239(14), 203(12), 147(20), 129(13), 73(26), 57(14), 43(12)  | 96 | 474 | 31376697  | 6,92  |

|    |        |      |                                                 |                                                                                          |    |     |          |       |
|----|--------|------|-------------------------------------------------|------------------------------------------------------------------------------------------|----|-----|----------|-------|
| 29 | 31.101 | 2771 | 2-Monostearin, 2TMS derivative                  | 341(23), 218(21), 217(94), 202(28), 147(43), 129(100), 103(39), 73(54), 57(21), 43(24)   | 91 | 502 | 9975855  | 2,20  |
| 30 | 31.589 | 2804 | Glycerol monostearate, 2TMS derivative          | 487(10), 400(30), 399(100), 202(14), 147(21), 129(16), 73(28), 71(9), 57(16), 43(15)     | 96 | 502 | 48211119 | 10,64 |
| 31 | 34.183 | 2997 | 2,3-Dihydroxypropyl icosanoate, 2TMS derivative | 515(13), 428(27), 427(100), 203(14), 147(15), 129(14), 73(30), 71(10), 57(17), 43(15)    | 80 | 530 | 431474   | 0,10  |
| 32 | 36.249 | 3160 | Cholesterol, TMS derivative                     | 458(40), 368(66), 353(34), 329(74), 129(100), 121(30), 95(37), 81(32), 74(32), 73(48)    | 96 | 458 | 8931990  | 1,97  |
| 33 | 37.490 | 3529 | 24-Methylene cholesterol                        | 386(39), 129(100), 119(43), 107(37), 95(42), 81(43), 74(38), 73(62), 69(46), 55(49)      |    |     | 7198459  | 1,59  |
| 34 | 39.017 | 3379 | Isofucosterol, O-TMS                            | 387(37), 386(100), 296(96), 280(55), 129(59), 95(37), 81(33), 73(64), 69(34), 55(57)     | 88 | 484 | 579016   | 0,13  |
| 35 | 42.703 | 3672 | Oleanolic acid 2TMS                             | 482(32), 320(31), 204(15), 203(100), 202(56), 190(27), 189(32), 133(16), 129(14), 73(45) | 90 | 600 | 979409   | 0,22  |

---

**Table S3.** List of identified compounds from *Skeletonema grevillei* extracts by GC-MS in bioreactor after 192 hours.

| No. | Retention time (min) | Retention index | Identified compound           | MS <i>m/z</i> (relative intensity)                                                     | Similarity (%) | Molar weight | Area    | Proportion (%) |
|-----|----------------------|-----------------|-------------------------------|----------------------------------------------------------------------------------------|----------------|--------------|---------|----------------|
| 1   | 3.099                | 1242            | Benzoic Acid, TMS derivative  | 193(11), 179(14), 178(100), 136(9), 135(69), 106(6), 105(75)                           | 96             | 194          | 555380  | 0,05           |
| 2   | 3.298                | 1253            | Octanoic acid, TMS derivative | 201(74), 132(18), 131(18), 129(17), 117(61), 75(91), 73(100), 70(16), 55(28), 41(23)   | 86             | 216          | 196879  | 0,02           |
| 3   | 3.599                | 1269            | Glycerol, 3TMS derivative     | 218(21), 206(11), 205(60), 148(11), 147(80), 133(16), 117(35), 103(32), 73(100), 45(9) | 94             | 308          | 1610692 | 0,13           |
| 4   | 5.082                | 1348            | Nonanoic acid, TMS derivative | 216(14), 215(90), 145(13), 132(32), 131(22), 129(27), 117(80), 75(91), 73(100), 55(15) | 95             | 230          | 971265  | 0,08           |
| 5   | 7.144                | 1451            | Decanoic acid, TMS derivative | 229(73), 132(28), 131(19), 129(25), 117(76), 75(96), 73(100), 55(17), 43(18), 41(16),  | 95             | 244          | 224588  | 0,02           |
| 6   | 8.909                | 1534            | 1-Dodecanethiol               | 97(71), 87(56), 83(75), 70(74), 69(87), 57(65), 56(78), 55(99), 43(100), 41(87)        | 91             | 202          | 166837  | 0,01           |

|           |        |      |                                  |                                                                                                |    |     |          |      |
|-----------|--------|------|----------------------------------|------------------------------------------------------------------------------------------------|----|-----|----------|------|
| <b>7</b>  | 11.499 | 1653 | Dodecanoic acid, TMS derivative  | 258(18), 257(86), 145(19), 132(39), 131(18), 129(34), 117(100), 75(69), 73(86), 55(19)         | 97 | 272 | 589219   | 0,05 |
| <b>8</b>  | 12.319 | 1691 | Tetradecanenitrile               | 110(73), 97(90), 96(64), 83(53), 82(53), 69(45), 57(61), 55(100), 43(70), 41(72)               | 85 | 326 | 395427   | 0,03 |
| <b>9</b>  | 13.621 | 1753 | Tridecanoic acid, TMS derivative | 272(17), 271(88), 145(21), 132(47), 131(17), 129(39), 117(100), 74(70), 73(91), 55(19)         | 94 | 286 | 1154450  | 0,10 |
| <b>10</b> | 13.918 | 1767 | 1-Tetradecanol, TMS derivative   | 272(25), 271(100), 102(15), 97(14), 83(14), 74(36), 73(18), 69(9), 57(8), 43(9)                | 91 | 286 | 145545   | 0,01 |
| <b>11</b> | 14.350 | 1788 | Loliolide, TMS                   | 268(20), 253(63), 225(20), 211(47), 178(63), 163(18), 133(21), 78(63), 75(100), 73(57), 42(36) | 93 | 268 | 713285   | 0,06 |
| <b>12</b> | 14.724 | 1805 | Azelaic acid, 2TMS derivative    | 317(65), 201(39), 152(24), 148(36), 146(22), 128(31), 117(21), 74(68), 73(100), 55(41)         | 82 | 332 | 76487    | 0,01 |
| <b>13</b> | 15.678 | 1853 | Myristic acid, TMS derivative    | 286(19), 285(83), 145(23), 132(49), 129(38), 117(100), 75(33), 73(85), 55(19), 43(20)          | 95 | 300 | 30410779 | 2,55 |

|    |        |      |                                                       |                                                                                             |    |     |          |      |
|----|--------|------|-------------------------------------------------------|---------------------------------------------------------------------------------------------|----|-----|----------|------|
| 14 | 16.198 | 1879 | Palmitoleonitrile                                     | 136(66), 122(82), 83(37), 70(37),<br>69(71), 56(38), 55(100), 54(30),<br>43(34), 41(83)     | 94 | 235 | 1284500  | 0,11 |
| 15 | 17.158 | 1930 | (E)-13-Methyltetradec-9-enoic<br>acid, TMS derivative | 311(43), 145(33), 129(82), 117(96),<br>96(25), 75(94), 73(100), 55(62),<br>43(23), 41(30)   | 86 | 312 | 612221   | 0,05 |
| 16 | 17.633 | 1952 | Pentadecanoic acid, TMS<br>derivative                 | 300(20), 299(85), 145(23), 132(49),<br>129(37), 117(100), 75(57), 73(81),<br>55(17), 43(21) | 94 | 314 | 2055261  | 0,17 |
| 17 | 18.625 | 2009 | Eicosapentaenoic acid, TMS<br>derivative              | 117(39), 107(34), 105(40), 93(36),<br>91(61), 80(46), 79(93), 74(89),<br>73(100), 67(38)    | 89 | 374 | 11598665 | 0,97 |
| 18 | 19.138 | 2031 | Palmitelaidic acid, TMS                               | 311(52), 145(31), 129(69), 117(86),<br>96(28), 81(24), 74(95), 73(100),<br>55(54), 41(33)   | 96 | 326 | 87911301 | 7,37 |
| 19 | 19.525 | 2053 | Palmitic Acid, TMS derivative                         | 314(16), 313(75), 145(27), 132(52),<br>129(38), 117(100), 74(55), 73(78),<br>55(19), 43(23) | 96 | 328 | 27511060 | 2,31 |
| 20 | 19.952 | 2076 | 9-Octadecynenitrile                                   | 96(32), 95(52), 82(47), 81(92),<br>79(32), 68(41), 67(100), 55(55),<br>54(41), 41(56)       | 89 | 261 | 5105299  | 0,43 |

|    |        |      |                                       |                                                                                             |    |     |          |      |
|----|--------|------|---------------------------------------|---------------------------------------------------------------------------------------------|----|-----|----------|------|
| 21 | 20.083 | 2083 | (Z)-9-Octadecenitrile                 | 136(56), 122(77), 97(38), 83(49),<br>70(37), 69(69), 56(39), 55(100),<br>43(46), 41(79)     | 97 | 263 | 35357695 | 2,96 |
| 22 | 21.313 | 2151 | Heptadecanoic acid, TMS<br>derivative | 328(19), 327(89), 145(33), 132(50),<br>129(35), 117(100), 74(55), 73(80),<br>55(21), 43(22) | 92 | 342 | 515709   | 0,04 |
| 23 | 21.913 | 2184 | Phytol, TMS derivative                | 203(6), 144(12), 143(100), 123(15),<br>81(8), 74(19), 73(28), 27(7), 55(5),<br>43(9)        | 92 | 368 | 17636940 | 1,48 |
| 24 | 22.392 | 2216 | Linoleic, TMS derivate                | 337(50), 131(62), 116(48), 95(32),<br>81(50), 75(100), 73(91), 67(57),<br>55(41), 41(34)    | 88 | 352 | 5597272  | 0,47 |
| 25 | 22.703 | 2230 | (Z)-Oleic Acid, TMS<br>derivative     | 339(67), 145(37), 129(63), 116(85),<br>96(30), 74(90), 73(100), 69(30),<br>55(55), 41(31)   | 94 | 354 | 28106811 | 2,36 |
| 26 | 23.033 | 2251 | Stearic acid, TMS derivative          | 342(25), 341(98), 145(29), 132(51),<br>129(35), 117(100), 75(37), 73(59),<br>55(16), 43(20) | 97 | 356 | 10492836 | 0,88 |
| 27 | 24.494 | 2337 | (Z)-10-Nonadecenoic<br>acid,TMS       | 353(52), 145(34)129(53), 116(77),<br>96(28), 74(84), 73(100), 69(32),<br>55(55), 41(29)     | 92 | 368 | 1228482  | 0,10 |

|    |        |      |                                                     |                                                                                              |    |     |           |       |
|----|--------|------|-----------------------------------------------------|----------------------------------------------------------------------------------------------|----|-----|-----------|-------|
| 28 | 24.969 | 2365 | 9-Octadecenamide                                    | 126(15), 112(13), 72(70), 69(16),<br>60(12), 59(100), 55(32), 44(12),<br>43(22), 41(25)      | 95 | 281 | 27499610  | 2,30  |
| 29 | 25.235 | 2381 | Eicosapentaenoic Acid, TMS<br>derivative            | 119(44), 117(60), 106(40), 105(43),<br>93(48), 91(76), 79(100), 74(75),<br>73(89), 67(54)    | 94 | 374 | 39206904  | 3,29  |
| 30 | 26.024 | 2430 | Oleamide, TMS derivative                            | 353(23), 338(57), 198(22), 144(80),<br>131(100), 128(43), 116(49), 74(57),<br>73(58), 55(22) | 83 | 353 | 594746694 | 49,84 |
| 31 | 26.267 | 2450 | Steramide, TMS derivative                           | 341(6), 340(21), 144(14), 32(12),<br>131(100), 128(8), 116(28), 74(22),<br>73(26), 43(10)    | 95 | 355 | 14833820  | 1,24  |
| 32 | 28.037 | 2560 | 2-Palmitoleoylglycerol bis-<br>trimethylsilyl ether | 218(33), 147(40), 129(96), 117(19),<br>103(100), 75(24), 73(92), 67(18),<br>55(30), 41(18)   | 90 | 472 | 5932037   | 0,50  |
| 33 | 28.082 | 2564 | Doconexent, TMS derivative                          | 119(37), 117(55), 108(38), 105(34),<br>93(42), 91(67), 79(86), 75(45),<br>73(100), 67(46)    | 97 | 400 | 6477284   | 0,54  |
| 34 | 28.307 | 2578 | 2-Palmitoylglycerol, 2TMS<br>derivative             | 313(23), 217(84), 203(26), 190(21),<br>147(48), 129(100), 103(37), 73(62),<br>57(21), 43(24) | 93 | 474 | 10599223  | 0,89  |

|    |        |      |                                                 |                                                                                        |    |     |          |      |
|----|--------|------|-------------------------------------------------|----------------------------------------------------------------------------------------|----|-----|----------|------|
| 35 | 28.798 | 2610 | 1-Monopalmitin, 2TMS derivative                 | 372(25), 371(100), 239(14), 203(11), 147(22), 129(11), 73(26), 71(9), 57(15), 43(14)   | 96 | 474 | 34669685 | 2,91 |
| 36 | 31.105 | 2771 | 2-Monostearin, 2TMS derivative                  | 341(30), 218(91), 203(27), 191(21), 147(42), 129(100), 103(39), 73(54), 57(22), 43(25) | 90 | 502 | 17380065 | 1,46 |
| 37 | 31.341 | 2787 | 1-Monooleoylglycerol, 2TMS derivative           | 397(80), 203(27), 201(19), 147(54), 129(100), 103(41), 83(20), 73(80), 69(31), 55(41)  | 93 | 500 | 4083277  | 0,34 |
| 38 | 31.598 | 2805 | Glycerol monostearate, 2TMS derivative          | 400(30), 399(100), 202(15), 147(24), 129(18), 73(34), 71(12), 57(20), 55(11), 43(19)   | 97 | 502 | 70689560 | 5,92 |
| 39 | 31.871 | 2826 | (Z)-Docos-13-enamide, TMS                       | 409(30), 394(38), 144(52), 131(100), 128(27), 116(34), 75(49), 73(46), 55(24), 43(16)  | 88 | 409 | 6825007  | 0,57 |
| 40 | 34.110 | 2998 | 2,3-Dihydroxypropyl icosanoate, 2TMS derivative | 428(35), 427(100), 206(21), 203(19), 147(28), 129(28), 75(19), 73(61), 57(24), 43(26)  | 93 | 530 | 1066093  | 0,09 |
| 41 | 35.056 | 3066 | 2-Arachidonoylglycerol, 2TMS derivative         | 147(19), 131(13), 129(45), 108(15), 105(14), 103(100), 91(20), 79(24), 73(67), 67(18)  | 89 | 522 | 1053023  | 0,09 |

|    |        |      |                             |                                                                                             |    |     |          |      |
|----|--------|------|-----------------------------|---------------------------------------------------------------------------------------------|----|-----|----------|------|
| 42 | 36.278 | 3163 | Cholesterol, TMS derivative | 458(46), 368(76), 353(36), 329(87),<br>129(100), 121(32), 95(38), 81(30),<br>74(32), 73(47) | 96 | 458 | 47323395 | 3,97 |
| 43 | 37.511 | 3261 | 24-Methylene cholesterol    | 386(50), 296(40), 129(100), 119(41),<br>107(34), 95(41), 81(38), 73(55),<br>69(41), 55(40)  |    |     | 36156623 | 3,03 |
| 44 | 39.013 | 3380 | Isofucosterol, TMS          | 387(32), 386(100), 296(84), 281(42),<br>129(67), 119(33), 74(28), 73(47),<br>69(38), 55(51) | 88 | 484 | 1804338  | 0,15 |
| 45 | 42.703 | 3672 | Oleanolic acid 2TMS         | 472(53), 367(25), 280(37), 207(21),<br>206(100), 129(36), 74(32), 73(85),<br>55(24), 43(26) | 90 | 600 | 766031   | 0,06 |

---

**Table S4.** List of identified compounds from *Skeletonema grevillei* extracts by GC-MS in bioreactor after 312 hours.

| No. | Retention time (min) | Retention index | Identified compound                   | MS <i>m/z</i> (relative intensity)                                                       | Similarity (%) | Molar weight | Area   | Proportion (%) |
|-----|----------------------|-----------------|---------------------------------------|------------------------------------------------------------------------------------------|----------------|--------------|--------|----------------|
| 1   | 3.527                | 1265            | Glycerol, 3TMS derivative             | 298(14), 217(20), 205(10), 204(55), 148(11), 147(72), 133(16), 116(32), 103(31), 73(100) | 92             | 308          | 979306 | 0,21           |
| 2   | 5.027                | 1345            | Nonanoic acid, TMS derivative         | 215(84), 132(29), 131(22), 129(22), 117(86), 74(94), 73(100), 55(16), 43(15), 41(13)     | 92             | 230          | 227297 | 0,05           |
| 3   | 7.115                | 1450            | Decanoic acid, TMS derivative         | 230(15), 229(100), 144(15), 132(34), 131(20), 128(28), 117(86), 74(82), 73(72), 55(20)   | 91             | 244          | 101778 | 0,02           |
| 4   | 8.143                | 1499            | Malic acid, 3TMS derivative           | 244(11), 232(23), 189(9), 148(9), 147(54), 133(10), 75(8), 74(8), 73(100), 54(8)         | 94             | 350          | 635539 | 0,13           |
| 5   | 11.485               | 1499            | Dodecanoic acid, trimethylsilyl ester | 258(20), 257(85), 132(39), 131(20), 129(37), 116(100), 74(70), 73(93), 55(18), 43(17)    | 93             | 272          | 130045 | 0,03           |
| 6   | 13.611               | 1752            | Tridecanoic acid, TMS derivative      | 272(19), 271(90), 145(18), 132(44), 129(35), 116(100), 74(67), 73(85), 55(19), 43(18)    | 94             | 286          | 651857 | 0,14           |

|    |        |      |                                                                 |                                                                                                |    |     |          |       |
|----|--------|------|-----------------------------------------------------------------|------------------------------------------------------------------------------------------------|----|-----|----------|-------|
| 7  | 14.339 | 1787 | Loliolide, TMS                                                  | 268(19), 252(66), 211(42), 178(57),<br>163(19), 135(20), 133(20), 74(100),<br>73(58), 43(37)   | 93 | 268 | 788245   | 0,17  |
| 8  | 15.673 | 1852 | Myristic acid, TMS derivative                                   | 286(16), 285(75), 145(22), 132(46),<br>129(36), 116(100), 74(62), 73(84),<br>55(19), 43(19)    | 96 | 300 | 30912180 | 6,50  |
| 9  | 16.179 | 1877 | (Z)-3-Hexenyl- $\beta$ -<br>glucopyranoside, 4TMS<br>derivative | 218(15), 217(50), 216(100),<br>204(18), 190(20), 147(21), 132(15),<br>129(44), 116(14), 73(80) | 90 | 550 | 1312557  | 0,28  |
| 10 | 17.628 | 1951 | Pentadecanoic acid, TMS<br>derivative                           | 299(59), 216(26), 145(22), 132(42),<br>129(34), 116(90), 74(51), 73(100),<br>55(15), 43(17)    | 85 | 314 | 2332135  | 0,49  |
| 11 | 18.722 | 2008 | Eicosapentaenoic Acid, TMS<br>derivative                        | 117(30), 107(37), 105(43), 93(32),<br>91(62), 80(45), 79(100), 74(83),<br>73(80), 67(33),      | 88 | 374 | 2998226  | 0,63  |
| 12 | 19.124 | 2030 | Palmitelaidic acid, TMS                                         | 311(32), 145(27), 129(58), 116(85),<br>96(26), 7(91), 73(100), 55(50),<br>43(23), 41(33),      | 97 | 326 | 57775151 | 12,15 |
| 13 | 19.516 | 2052 | Palmitic Acid, TMS derivative                                   | 313(68), 314(18), 145(27), 132(51),<br>129(36), 116(100), 74(57), 73(79),<br>55(19), 43(23)    | 95 | 328 | 12974547 | 2,73  |

|    |        |      |                                                     |                                                                                            |    |     |         |      |
|----|--------|------|-----------------------------------------------------|--------------------------------------------------------------------------------------------|----|-----|---------|------|
| 14 | 20.060 | 2082 | (Z)-9-Octadecenitrile                               | 136(60), 122(77), 97(37), 83(50),<br>70(40), 69(73), 56(38), 55(100),<br>43(46), 41(79)    | 97 | 263 | 1802523 | 0,38 |
| 15 | 20.285 | 2094 | Heptadecanoic acid, TMS<br>derivative               | 327(89), 145(38), 132(52), 129(57),<br>117(100), 74(75), 73(70), 57(58),<br>55(36), 43(62) | 83 | 342 | 157516  | 0,03 |
| 16 | 21.429 | 2157 | Palmitoleamide                                      | 126(14), 112(11), 72(73), 69(15),<br>60(10), 59(100), 55(35), 44(13),<br>43(23), 41(30),   | 93 | 253 | 175511  | 0,04 |
| 17 | 21.531 | 2163 | 1-Octadecanol, TMS derivative                       | 328(24), 327(100), 103(16), 97(17),<br>83(16), 75(33), 73(22), 57(13),<br>55(12), 43(12)   | 87 | 342 | 69796   | 0,01 |
| 18 | 21.801 | 2178 | Octadecanamide                                      | 128(6), 86(5) 73(6), 72(44), 60(7),<br>59(100), 57(7), 44(9), 43(15), 41(8)                | 85 | 319 | 131621  | 0,03 |
| 19 | 21.910 | 2184 | Phytol, TMS derivative                              | 144(11), 143(100), 124(5), 123(14),<br>81(9), 75(18), 73(24), 57(6), 55(5),<br>43(8)       | 97 | 368 | 9943488 | 2,09 |
| 20 | 22.456 | 2215 | (Z, Z)-9,12-Octadecadienoic<br>acid, TMS derivative | 337(57), 262(37), 129(37), 95(50),<br>82(36), 81(69), 74(94), 73(100),<br>67(71), 55(48)   | 92 | 352 | 2080686 | 0,44 |
| 21 | 22.689 | 2229 | (Z)-Oleic Acid, TMS derivative                      | 339(58), 145(27), 129(57), 117(62),<br>96(23), 74(81), 73(100), 69(26),<br>55(46), 41(28)  | 94 | 354 | 4278517 | 0,90 |

|    |        |      |                                                                 |                                                                                             |    |     |           |       |
|----|--------|------|-----------------------------------------------------------------|---------------------------------------------------------------------------------------------|----|-----|-----------|-------|
| 22 | 23.036 | 2250 | Stearic acid, TMS derivative                                    | 342(21), 341(78), 145(34), 132(57),<br>129(41), 117(100), 74(60), 73(86),<br>55(23), 43(30) | 95 | 356 | 3070858   | 0,65  |
| 23 | 23.133 | 2256 | 11-Methyloctadec-12-enoic acid,<br>TMS derivative               | 353(100), 229(64), 129(37),<br>117(56), 83(37), 75(70), 73(72),<br>69(78), 55(90), 41(30)   | 86 | 368 | 249651    | 0,05  |
| 24 | 24.396 | 2331 | (all-Z)-5,8,11,14,17-<br>Eicosapentaenoic acid, methyl<br>ester | 119(39), 106(33), 105(40), 93(48),<br>91(73), 80(34), 79(100), 77(30),<br>67(53), 41(37)    | 90 | 330 | 748759    | 0,16  |
| 25 | 24.912 | 2362 | 9-Octadecenamide, (Z)-                                          | 72(71), 69(11), 67(13), 60(9),<br>59(100), 57(14), 55(35), 44(16),<br>43(27), 41(38)        | 96 | 281 | 11871750  | 2,50  |
| 26 | 25.095 | 2373 | (Z)-5,8,11-Eicosatrienoic acid,<br>TMS derivative               | 117(59), 106(45), 105(34), 93(55),<br>91(58), 80(67), 79(88), 75(82),<br>73(100), 67(59)    | 90 | 378 | 3226506   | 0,68  |
| 27 | 25.224 | 2380 | Eicosapentaenoic Acid, TMS<br>derivative                        | 119(42), 117(63), 106(43), 105(47),<br>93(52), 91(79), 79(100), 74(80),<br>73(95), 67(57)   | 96 | 374 | 28541554  | 6,00  |
| 28 | 25.896 | 2422 | Oleamide, TMS derivative                                        | 338(53), 353(26), 144(79),<br>131(100), 128(39), 116(52), 74(65),<br>73(61), 55(22), 41(19) | 82 | 353 | 137888236 | 29,00 |

|    |        |      |                                         |                                                                                              |    |     |          |      |
|----|--------|------|-----------------------------------------|----------------------------------------------------------------------------------------------|----|-----|----------|------|
| 29 | 25.985 | 2428 | Oleamide, TMS derivative                | 353(23), 338(33), 144(54),<br>131(100), 128(32), 116(40), 74(55),<br>73(51), 55(22), 43(17)  | 82 | 353 | 20828960 | 4,38 |
| 30 | 26.158 | 2438 | Oleamide, TMS derivative                | 338(40), 353(19), 144(48),<br>131(100), 128(36), 116(43), 74(66),<br>73(53), 55(34), 41(24)  | 79 | 353 | 1298335  | 0,27 |
| 31 | 26.280 | 2448 | N-Trimethylsilylstearamide              | 340(21), 144(13), 132(13),<br>131(100), 128(7), 116(31), 75(23),<br>73(29), 43(12), 41(6)    | 95 | 355 | 3309798  | 0,70 |
| 32 | 28.075 | 2564 | Doconexent, TMS derivative              | 119(45), 117(63), 108(38), 105(43),<br>93(50), 91(84), 79(99), 74(57), 73<br>(100), 67(54)   | 89 | 400 | 903754   | 0,19 |
| 33 | 28.299 | 2578 | 2-Palmitoylglycerol, 2TMS<br>derivative | 313(21), 218(73), 203(25), 190(20),<br>147(54), 129(100), 103(43), 73(84),<br>55(21), 43(21) | 87 | 474 | 5176829  | 1,09 |
| 34 | 28.782 | 2610 | 1-Monopalmitin, 2TMS<br>derivative      | 372(37), 371(100), 239(19),<br>204(12), 202(16), 147(29), 129(16),<br>73(35), 57(19), 43(17) | 96 | 474 | 13751047 | 2,89 |
| 35 | 31.099 | 2770 | 2-Monostearin, 2TMS derivative          | 341(28), 217(95), 202(25), 190(22),<br>147(43), 129(100), 103(37), 73(55),<br>57(22), 43(24) | 90 | 502 | 7539368  | 1,59 |

|    |        |      |                                             |                                                                                        |    |     |          |      |
|----|--------|------|---------------------------------------------|----------------------------------------------------------------------------------------|----|-----|----------|------|
| 36 | 31.332 | 2787 | 1-Monooleoylglycerol, 2TMS derivative       | 398(25), 397(57), 204(24), 202(28), 147(49), 129(100), 102(47), 95(26), 73(88), 55(30) | 90 | 500 | 455591   | 0,10 |
| 37 | 31.584 | 2804 | Glycerol monostearate, 2TMS derivative      | 400(28), 399(100), 202(14), 147(22), 129(17), 73(30), 71(10), 57(17), 55(10), 43(16)   | 96 | 502 | 44230013 | 9,30 |
| 38 | 31.862 | 2825 | (Z)-Docos-13-enamide, N-TMS                 | 409(27), 394(34), 144(50), 131(100), 128(28), 116(30), 74(51), 73(62), 55(21), 43(14)  | 81 | 409 | 453533   | 0,10 |
| 39 | 34.181 | 2997 | Eicosanoic acid, 2,3-bis-(OTMS)propyl ester | 428(33), 427(100), 205(10), 202(14), 147(21), 129(19), 103(10), 73(38), 57(15), 43(13) | 89 | 530 | 718301   | 0,15 |
| 40 | 35.049 | 3066 | 2-Arachidonoylglycerol, 2TMS derivative     | 147(18), 129(45), 108(12), 105(15), 103(100), 93(14), 91(19), 79(25), 73(66), 67(14)   | 88 | 522 | 460175   | 0,10 |
| 41 | 36.260 | 3162 | Cholesterol, TMS derivative                 | 458(49), 368(92), 353(36), 329(87), 129(100), 121(31), 95(39), 81(31), 74(33), 73(48)  | 96 | 458 | 29524236 | 6,21 |
| 42 | 36.749 | 3201 | Desmosterol, TMS derivative                 | 343(78), 253(53), 133(51), 129(100), 119(77), 95(43), 81(39), 75(41), 73(90), 69(90)   | 90 | 456 | 1900720  | 0,40 |

|    |        |      |                          |                                                                                               |    |     |          |      |
|----|--------|------|--------------------------|-----------------------------------------------------------------------------------------------|----|-----|----------|------|
| 43 | 37.499 | 3260 | 24-Methylene cholesterol | 386(51), 296(36), 129(100),<br>119(43), 95(41), 81(41), 74(37),<br>73(61), 69(44), 55(42)     |    |     | 24216310 | 5,09 |
| 44 | 39.010 | 3380 | Isofucosterol, O-TMS     | 387(35), 386(100), 296(68),<br>281(32), 129(69), 119(32), 95(31),<br>73(47), 69(39), 55(54)   | 81 | 484 | 929026   | 0,20 |
| 45 | 42.713 | 3672 | Oleanolic acid 2TMS      | 473(39), 472(100), 471(39),<br>367(95), 159(35), 135(42), 133(51),<br>129(82), 73(82), 43(28) | 92 | 600 | 3804734  | 0,80 |

---
